# Supplementary material
Source: Research Square preprint supplement (doi:10.21203/rs.3.rs-9561852/v1)
Supplement: Supplementary file 1 [file ab3f5c5c18cc01ad9d0c6420.docx]

**Gut-derived extracellular vesicle enriched miR-125a-5p mediates cadmium-induced intestinal injury through NF-κB pathway activation**

Mengzhen Song, Lina Ping, Yulin Wang, Wenjun Zhou, Jinping Fan, Shiyu Tao, Yaoqin Shen*

**Authors and Affiliations:**

College of Animal Science & Technology and College of Veterinary Medicine, Huazhong Agricultural University, Wuhan 430070, China

***Corresponding author:** **Yaoqin Shen**, College of Animal Science & Technology and College of Veterinary Medicine, Huazhong Agricultural University, Wuhan, China 430070 (**e-mail:yshen@mail.hzau.edu.cn**).

**Table S1:** Differentially expressed miRNAs in C-EVs vs.Cd-EVs

| miRNAs | C-EVs (Mean) | Cd-EVs (Mean) | Log2FC (Cd-EVs/C-EVs) | P value | P adjust | Regulate |
| --- | --- | --- | --- | --- | --- | --- |
| 1_1129 | 536.87 | 33.03 | -3.711 | 0.038 | 0.201 | down |
| 1_1767 | 2624.44 | 320.21 | -3.030 | 0.000 | 0.003 | down |
| 1_1768 | 2624.44 | 320.21 | -3.030 | 0.000 | 0.003 | down |
| 1_2164 | 439.81 | 0.00 | -4.379 | 0.041 | 0.201 | down |
| 1_492 | 1272.79 | 4235.65 | 1.818 | 0.000 | 0.004 | up |
| 10_2411 | 0.00 | 444.50 | 4.231 | 0.021 | 0.128 | up |
| 10_2412 | 0.00 | 444.50 | 4.231 | 0.021 | 0.128 | up |
| 10_3543 | 362.99 | 0.00 | -4.088 | 0.043 | 1.000 | down |
| 11_3801 | 2006.97 | 13412.10 | 2.813 | 0.000 | 0.000 | up |
| 11_4517 | 928.58 | 121.76 | -2.947 | 0.024 | 0.138 | down |
| 12_5841 | 0.00 | 456.27 | 4.280 | 0.021 | 0.128 | up |
| 13_7434 | 87.96 | 7655.32 | 6.481 | 0.000 | 0.000 | up |
| 14_8832 | 503.43 | 0.00 | -4.545 | 0.012 | 0.099 | down |
| 15_10108 | 0.00 | 432.47 | 4.197 | 0.024 | 0.138 | up |
| 15_9547 | 0.00 | 1116.30 | 5.559 | 0.000 | 0.004 | up |
| 15_9978 | 1235.53 | 3318.94 | 1.521 | 0.003 | 0.039 | up |
| 16_10586 | 0.00 | 1077.94 | 5.504 | 0.000 | 0.008 | up |
| 16_11364 | 0.00 | 9429.79 | 8.641 | 0.000 | 0.000 | up |
| 18_13215 | 91.77 | 1001.52 | 3.550 | 0.008 | 0.066 | up |
| 18_13726 | 0.00 | 391.60 | 4.056 | 0.035 | 0.186 | up |
| 3_17548 | 0.00 | 489.56 | 4.367 | 0.015 | 0.114 | up |
| 4_18980 | 0.00 | 27767.71 | 10.200 | 0.000 | 0.000 | up |
| 5_21252 | 1808.17 | 6017.72 | 1.826 | 0.000 | 0.004 | up |
| 5_21358 | 87.96 | 656.12 | 2.946 | 0.040 | 0.201 | up |
| 5_22212 | 0.00 | 550.04 | 4.541 | 0.014 | 0.106 | up |
| 6_23425 | 9069.68 | 3493.60 | -1.306 | 0.000 | 0.004 | down |
| 7_25459 | 584.06 | 0.00 | -4.764 | 0.006 | 0.063 | down |
| 8_26159 | 0.00 | 855.71 | 5.184 | 0.001 | 0.014 | up |
| 9_28069 | 3088.88 | 833.31 | -1.804 | 0.002 | 0.026 | down |
| X_30769 | 0.00 | 587.26 | 4.635 | 0.007 | 0.063 | up |
| mmu-miR-125a-5p | 318.13 | 1244.78 | 2.051 | 0.020 | 0.128 | up |
| mmu-miR-1a-3p | 177.97 | 1051.91 | 2.643 | 0.019 | 0.128 | up |
| mmu-miR-2137 | 991.91 | 2854.83 | 1.597 | 0.004 | 0.045 | up |
| mmu-miR-30b-5p | 1675.63 | 426.03 | -1.862 | 0.017 | 0.117 | down |
| mmu-miR-30c-5p | 3916.25 | 1397.05 | -1.381 | 0.004 | 0.045 | down |
| mmu-miR-335-5p | 43.10 | 1471.31 | 5.009 | 0.001 | 0.014 | up |
| mmu-miR-5106 | 3690.54 | 1722.31 | -1.017 | 0.026 | 0.142 | down |
| mmu-miR-5108 | 778.45 | 2172.14 | 1.573 | 0.012 | 0.099 | up |
| mmu-miR-5110 | 89.73 | 727.49 | 3.061 | 0.041 | 0.201 | up |
| mmu-miR-6239 | 956.70 | 2199.57 | 1.293 | 0.044 | 0.210 | up |

**Table S2:** List of antibodies used for western blot analysis

| Antibodies | Source | Product number | Dilution |
| --- | --- | --- | --- |
| p-NF-κB p65 | CST | 3033 | 1: 1000 |
| NF-κB p65 | CST | 8242 | 1: 1000 |
| ZO-1 | Abcam | ab96587 | 1: 1000 |
| Occludin | Abcam | ab167161 | 1: 1000 |
| Claudin-1 | Abcam | ab307692 | 1: 1000 |
| β-actin | CST | 4967 | 1: 1000 |
| Goat anti-rabbit | Santa Cruz | sc-2004 | 1: 10000 |

**Figure S1**


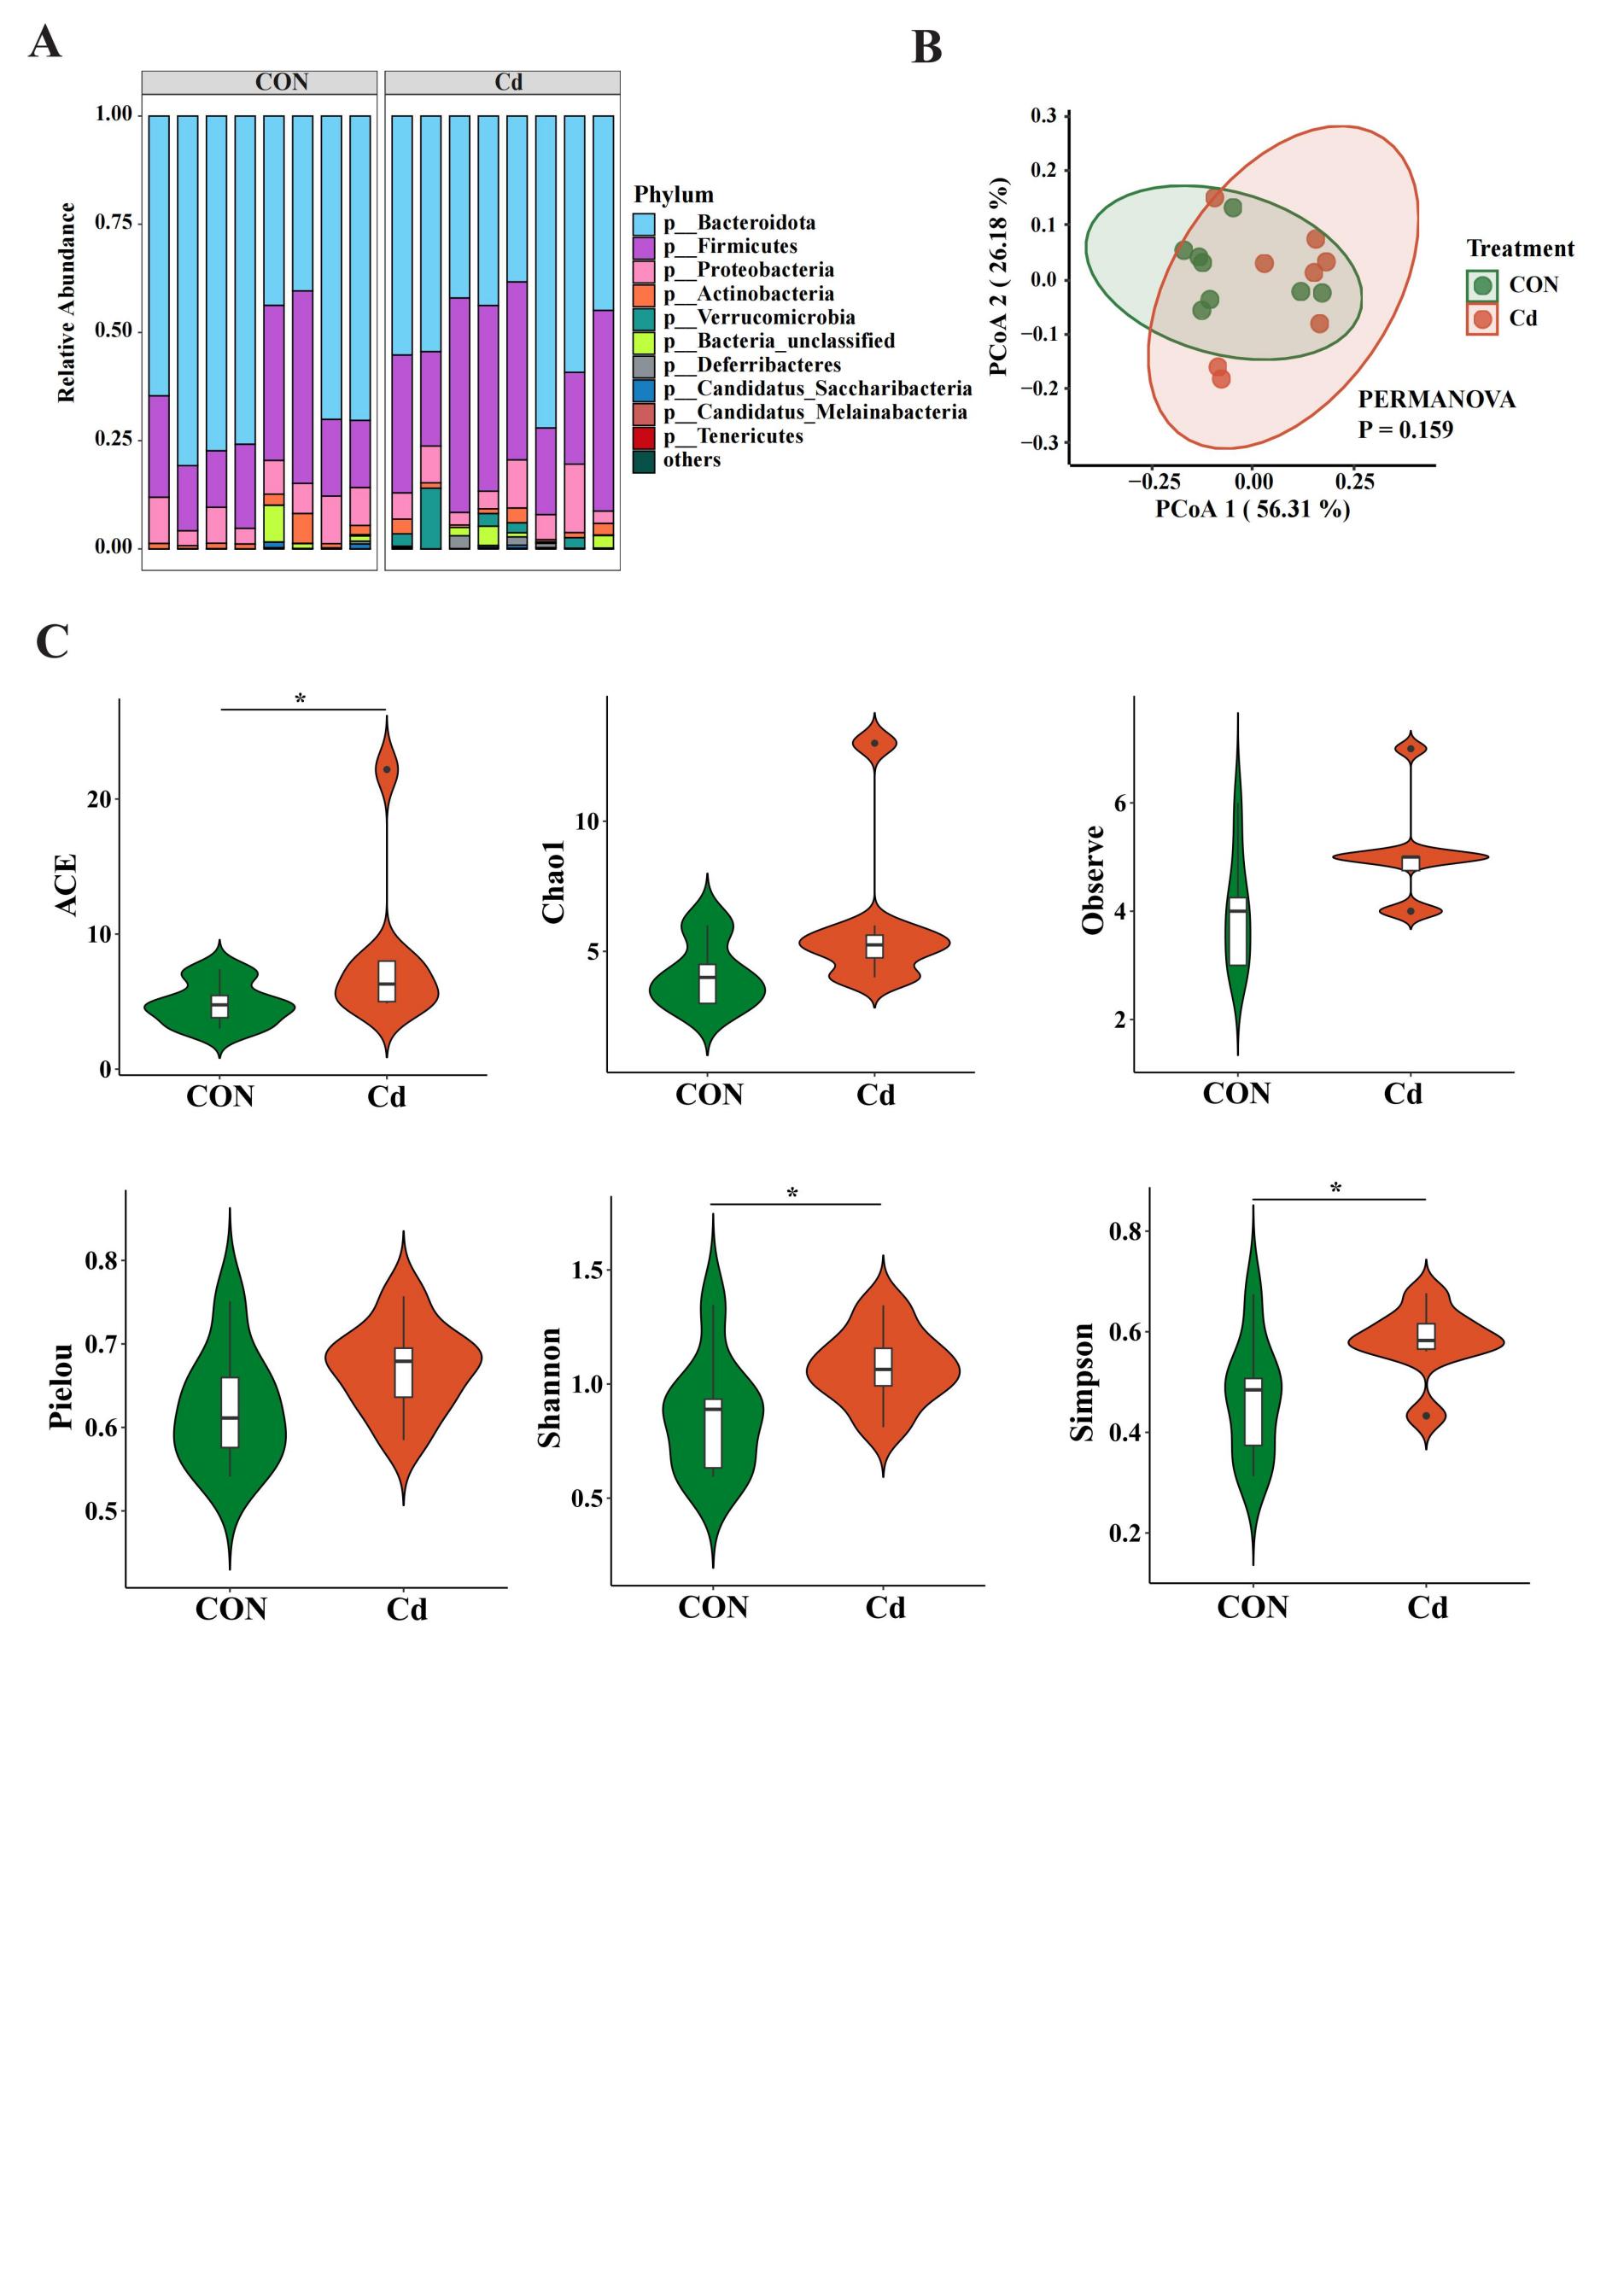


**Figure S1. Phylum‑level disruption of gut microbiota induced by cadmium.**(A) Phylum‑level taxonomic composition bar plot. (B) Principal coordinates analysis (PCOA) at the phylum level. (C) Phylum‑level α‑diversity indices. n = 8. *P < 0.05.

**
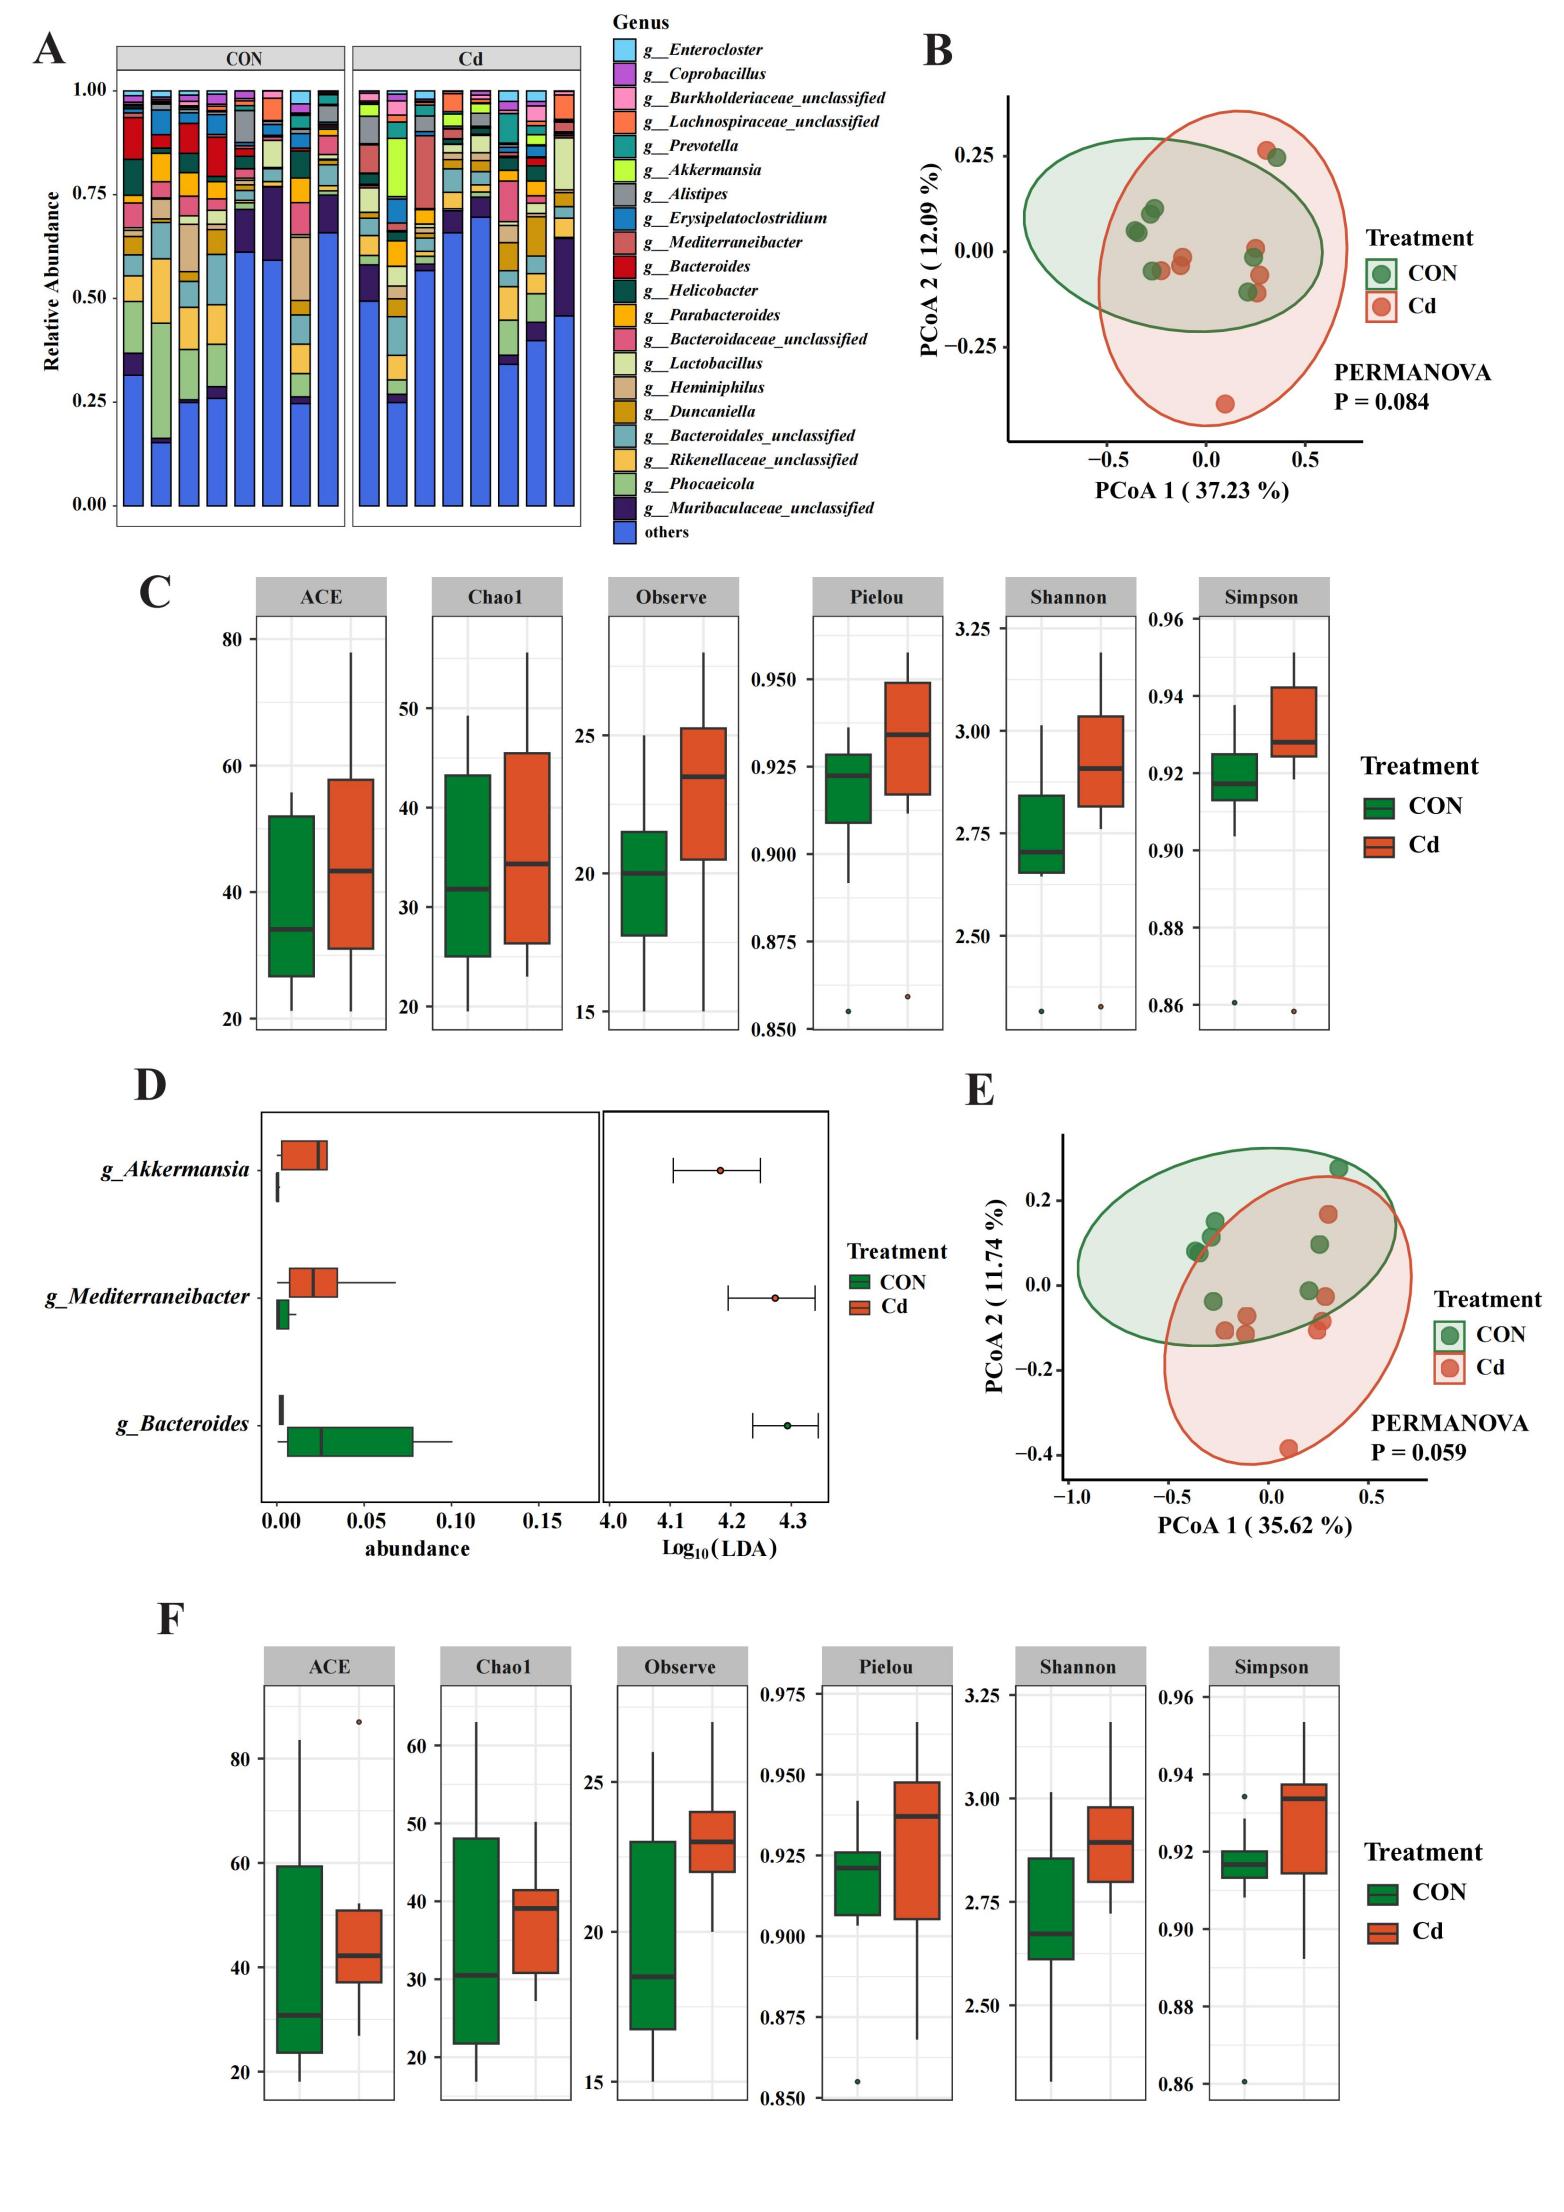
Figure S2**

**Figure S2. Genus‑ and species‑level disruption of gut microbiota induced by cadmium.** (A) Genus‑level taxonomic composition bar plot. (B) Principal coordinates analysis (PCOA) at the genus level. (C) Genus‑level α‑diversity indices. (D) Differentially abundant taxa at the genus level. (E) Principal coordinates analysis (PCOA) at the species level. (F) Species‑level α‑diversity indices. N = 8.

**Figure S3**


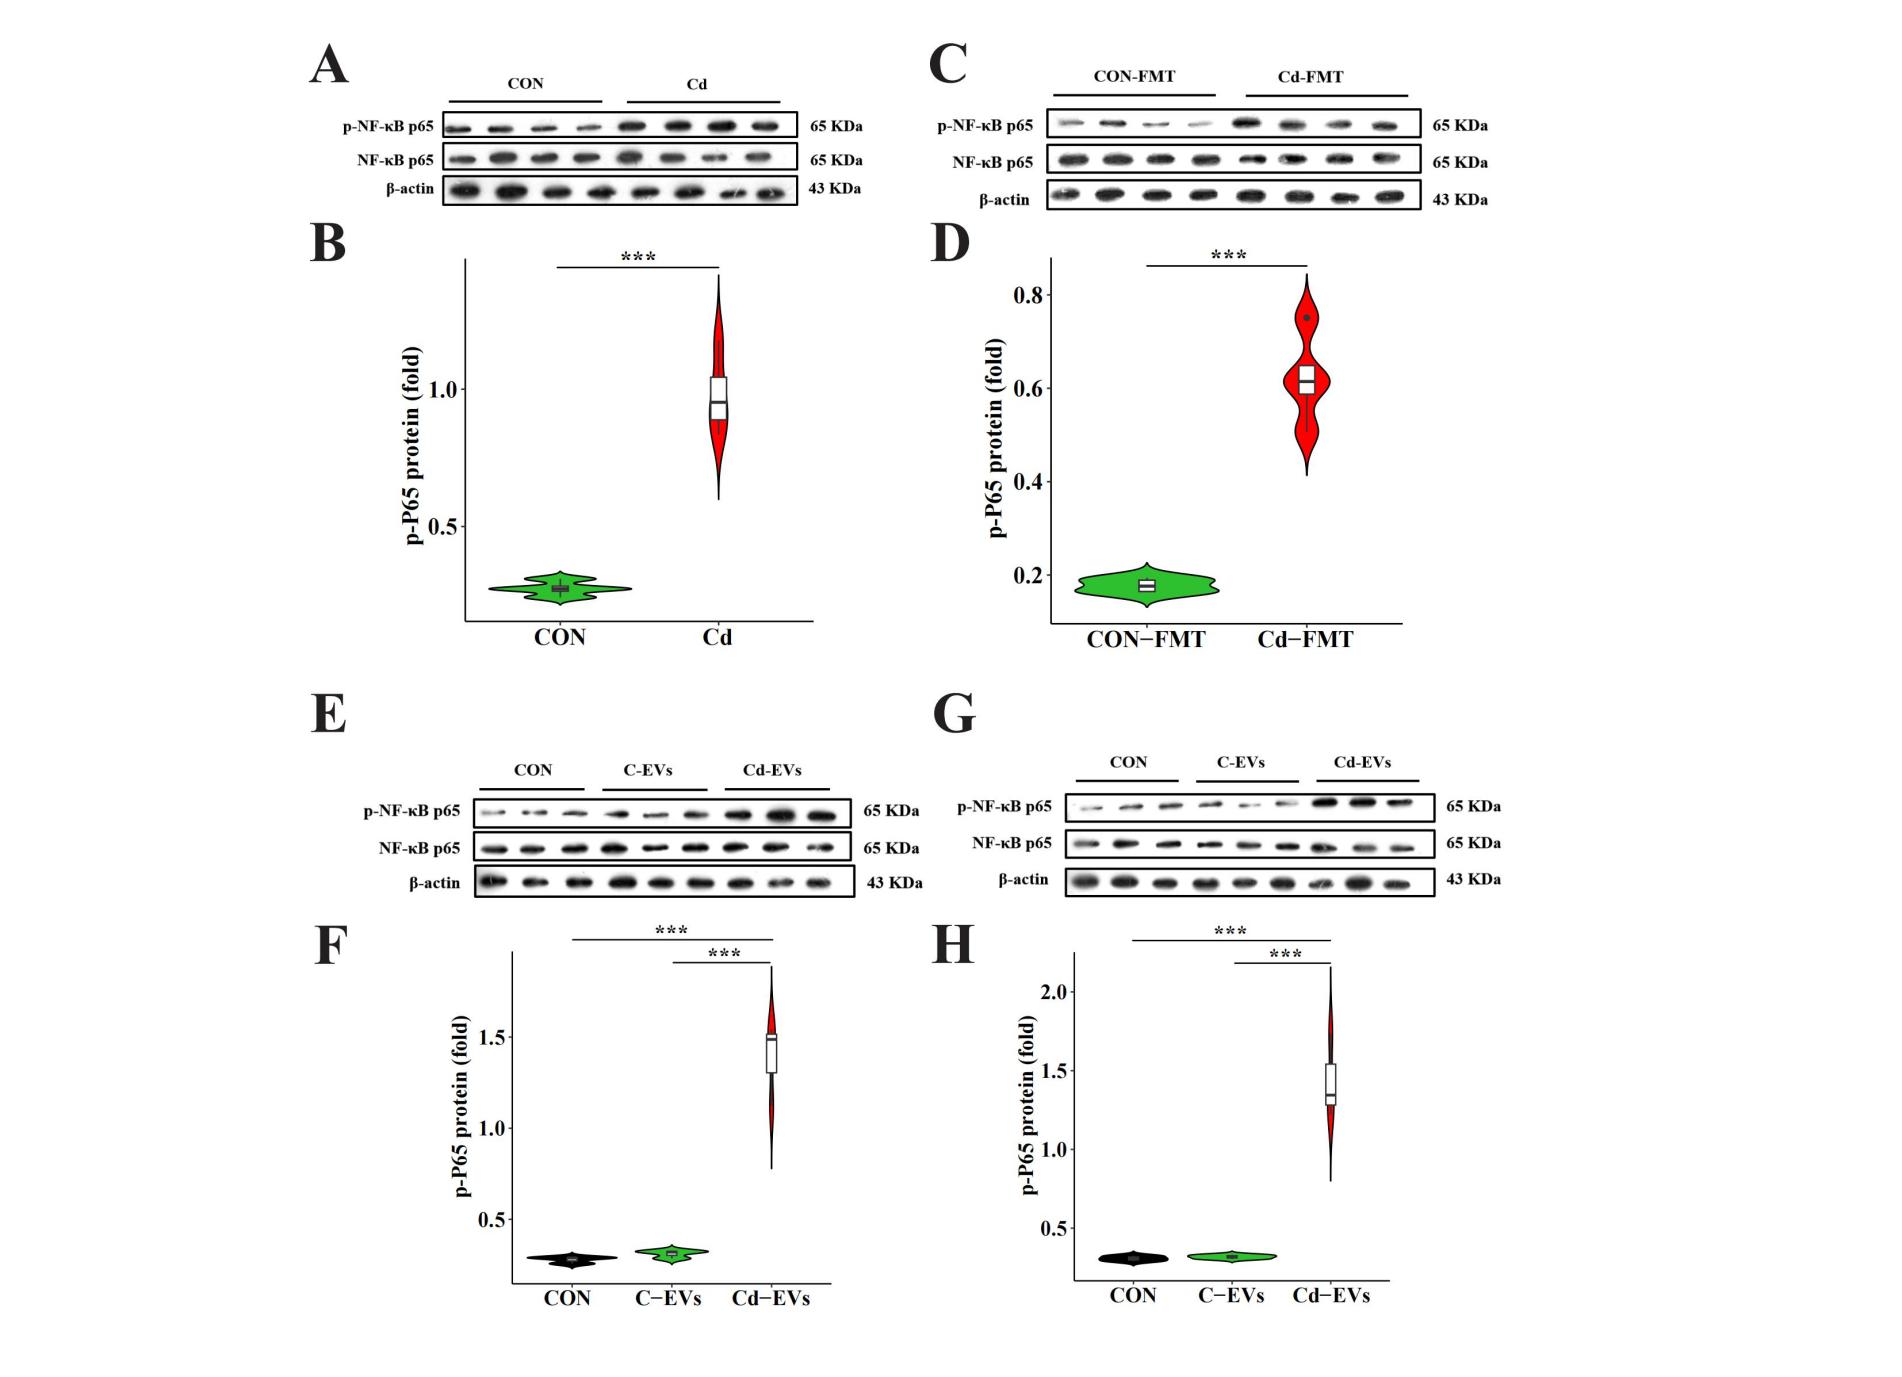


**Figure S3. Expression of p‑NF‑κB‑p65 in vivo and in vitro.** (A) Expression of p‑NF‑κB‑p65 in the jejunum of mice upon cadmium treatment. (B) Expression of p‑NF‑κB‑p65 in the jejunum of mice following fecal microbiota transplantation (FMT). (C) Expression of p‑NF‑κB‑p65 in the jejunum of mice after EVs intervention. (D) Expression of p‑NF‑κB‑p65 in MODE‑K cells following EVs intervention. Statistical differences were evaluated by one‑way ANOVA with Tukey’s post‑hoc test. Data are presented as mean ± SEM. N=3. Significance thresholds: ***P < 0.001.
